# Supplementary material
Source: Preprints.org preprint supplement (doi:10.20944/preprints201912.0151.v1)

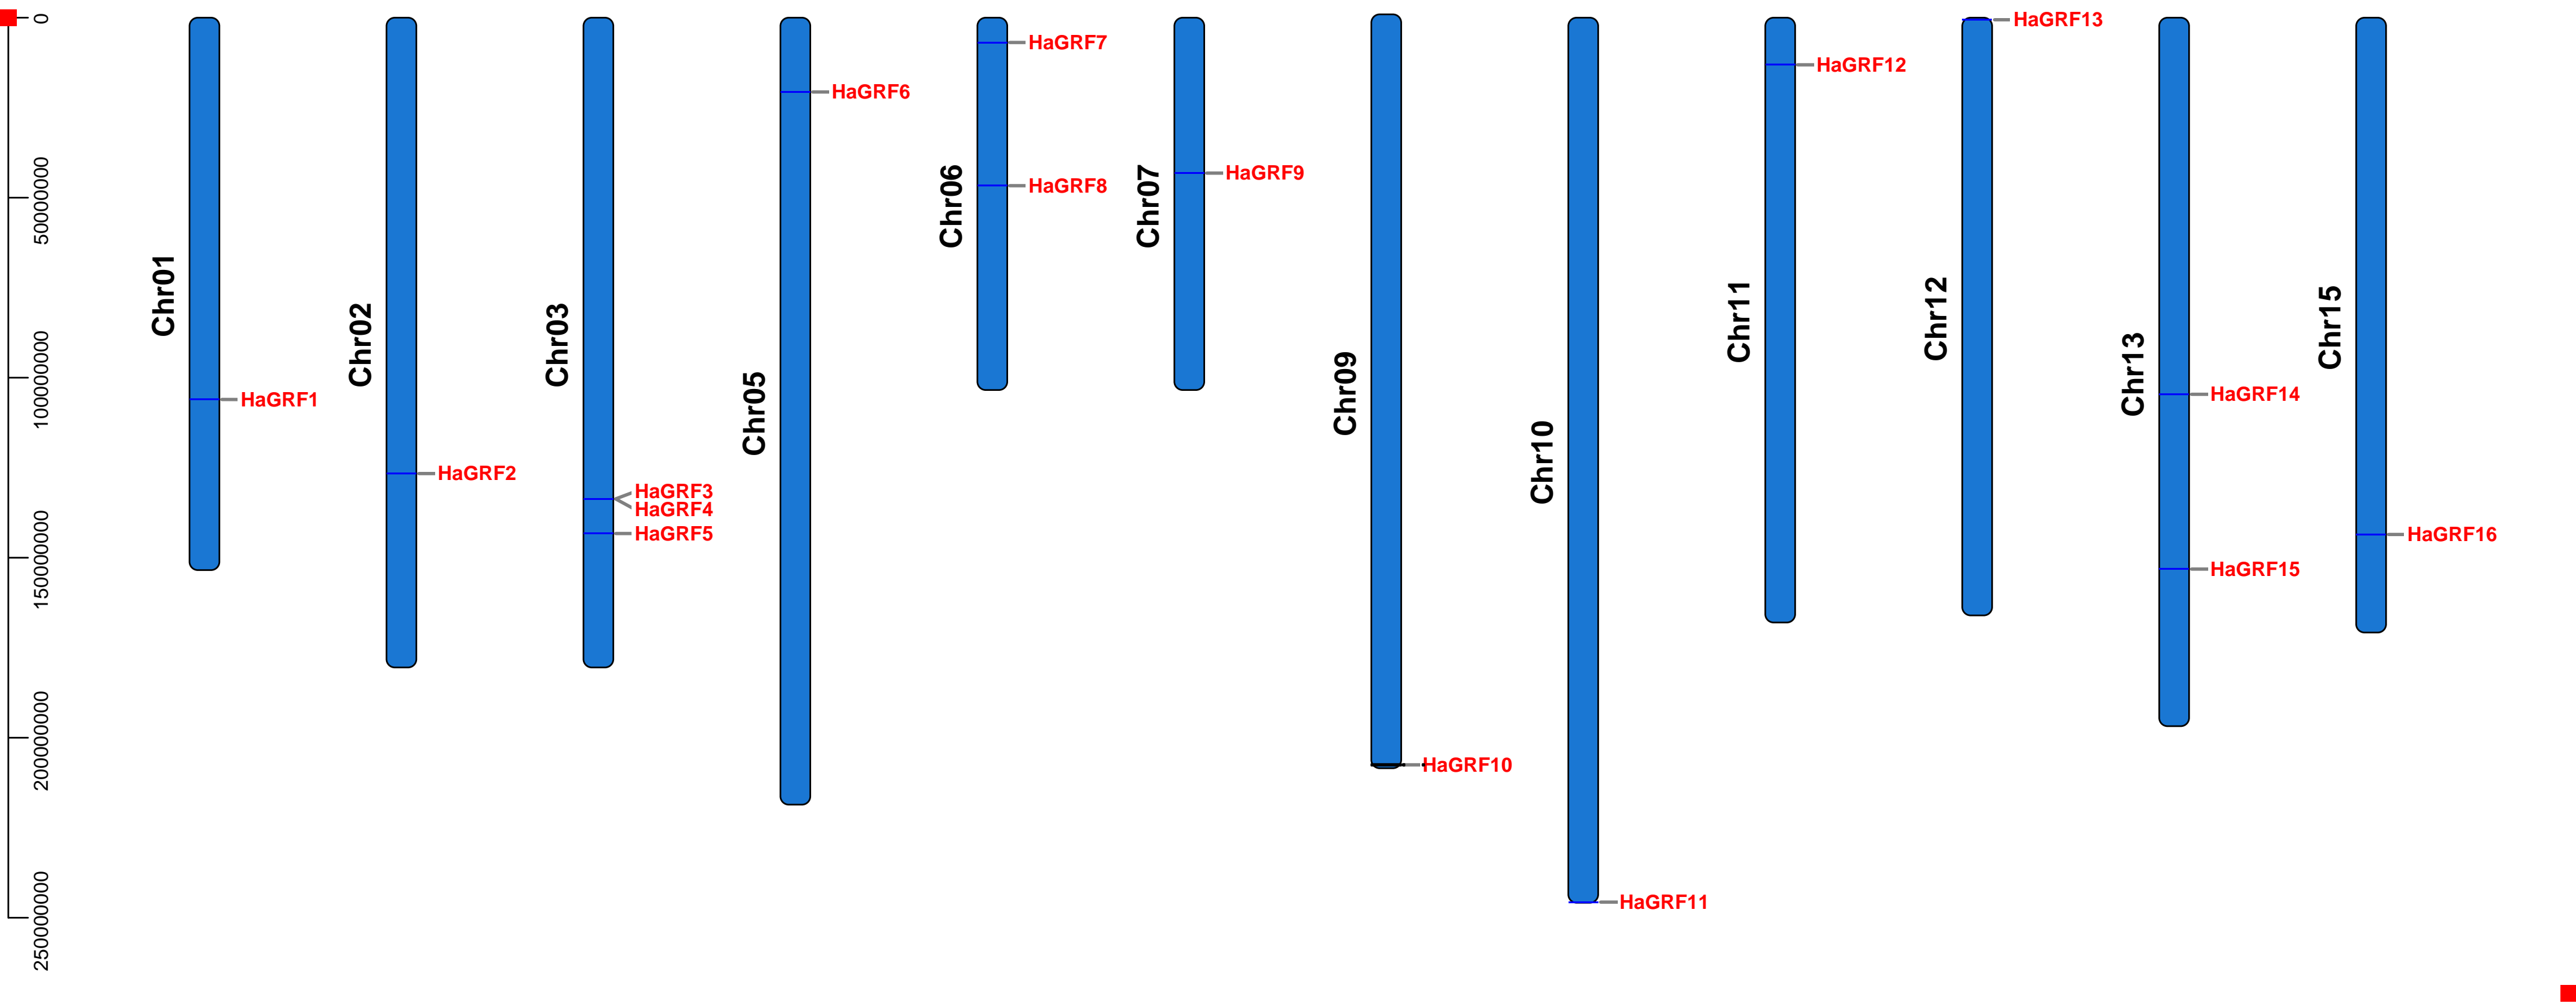

Supplement: Supplementary file 1 [file supplementary]
